# Supplementary material
Source: Springer Nature journal article supplement (https://www.springermedizin.de/resource/supplementary/12913_2007_578_MOESM4_ESM.pdf/9535272)

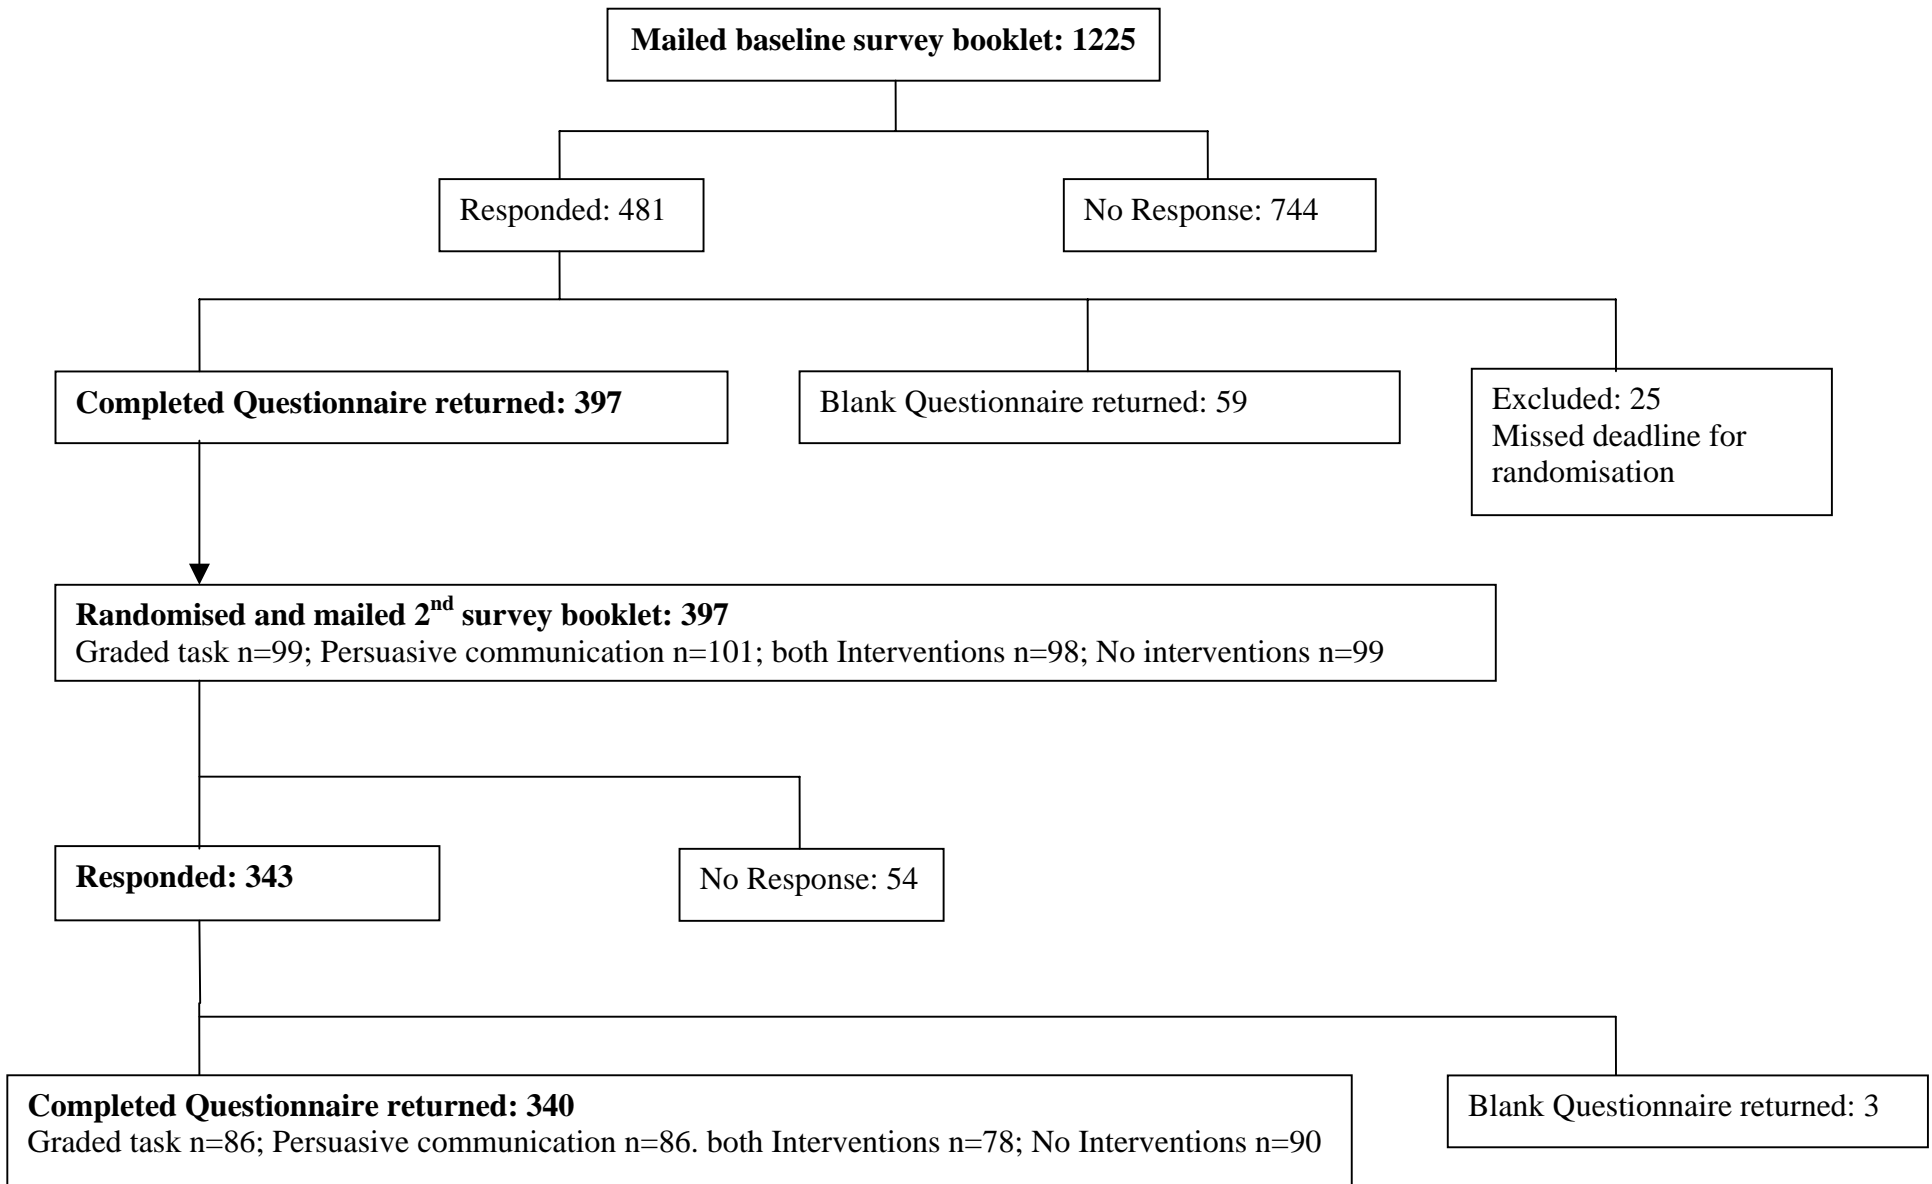

Supplement: MOESM4 [file 9535272]
